# Supplementary material
Source: Springer Nature journal article supplement (https://www.springermedizin.de/resource/supplementary/12916_2012_732_MOESM5_ESM.pdf/9598648)

## Men

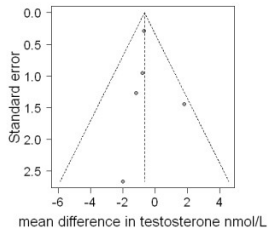

## Women

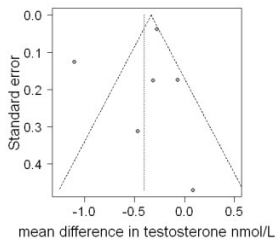

## All

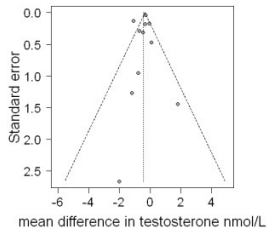

Supplement: MOESM5 [file 9598648]
